# Supplementary material for: The lncRNA XIST/miR‐125b‐2‐3p axis modulates cell proliferation and chemotherapeutic sensitivity via targeting Wee1 in colorectal cancer
Source: PubMed Central journal article supplement (PMC7982616; doi:10.1002/cam4.3777), 2021-03-05

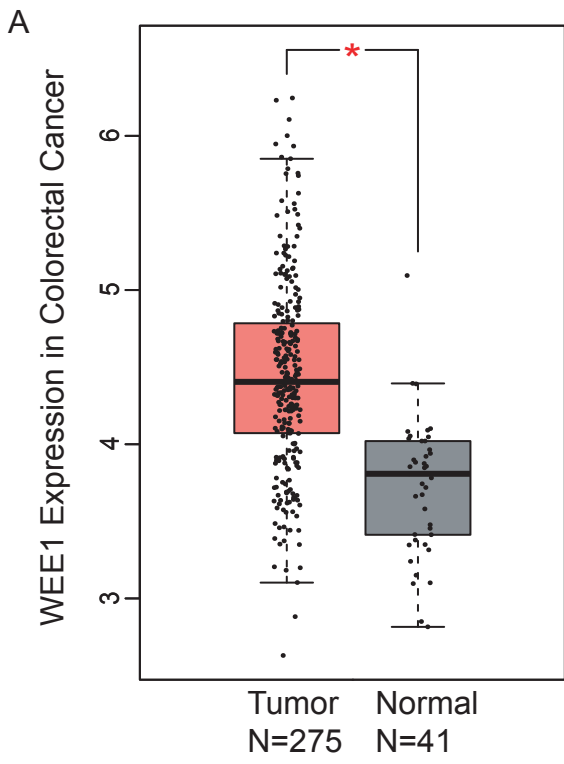

**B**

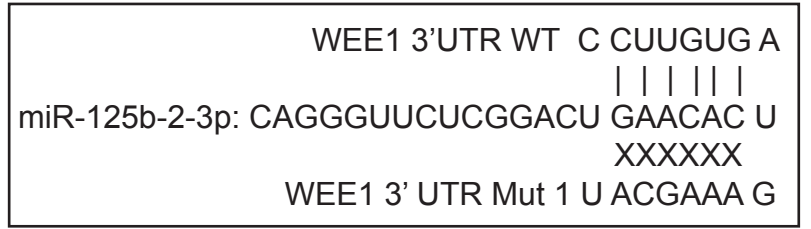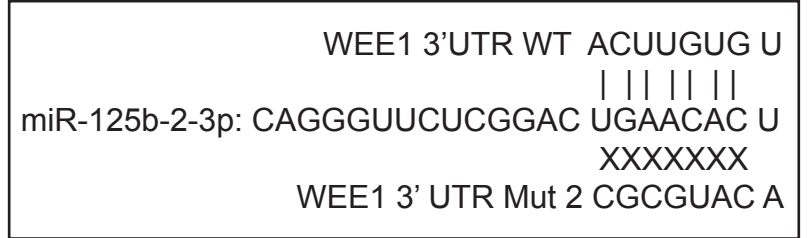

Supplement: CAM4-10-2423-s004.pdf [file CAM4-10-2423-s004.pdf]
