# Supplementary material for: The lncRNA XIST/miR‐125b‐2‐3p axis modulates cell proliferation and chemotherapeutic sensitivity via targeting Wee1 in colorectal cancer
Source: PubMed Central journal article supplement (PMC7982616; doi:10.1002/cam4.3777), 2021-03-05

**A**

miR-125b-5p 3'-agtgttcaaTCCCAGAGTCCct-5'  
 |||||  
 LncRNA XIST 5'-actgataaaAGGG CTCAGGGt-3'

miR-125b-5p 3'-agTGTTCaATCC--CAGAGTCCct-  
 |||||  
 LncRNA XIST 5'-tcAAAAGATCGGCCcAGCTCAGG

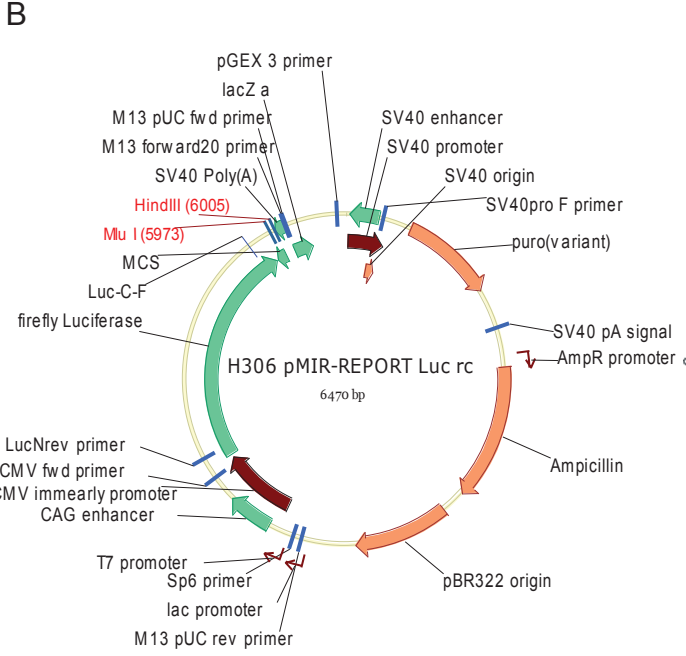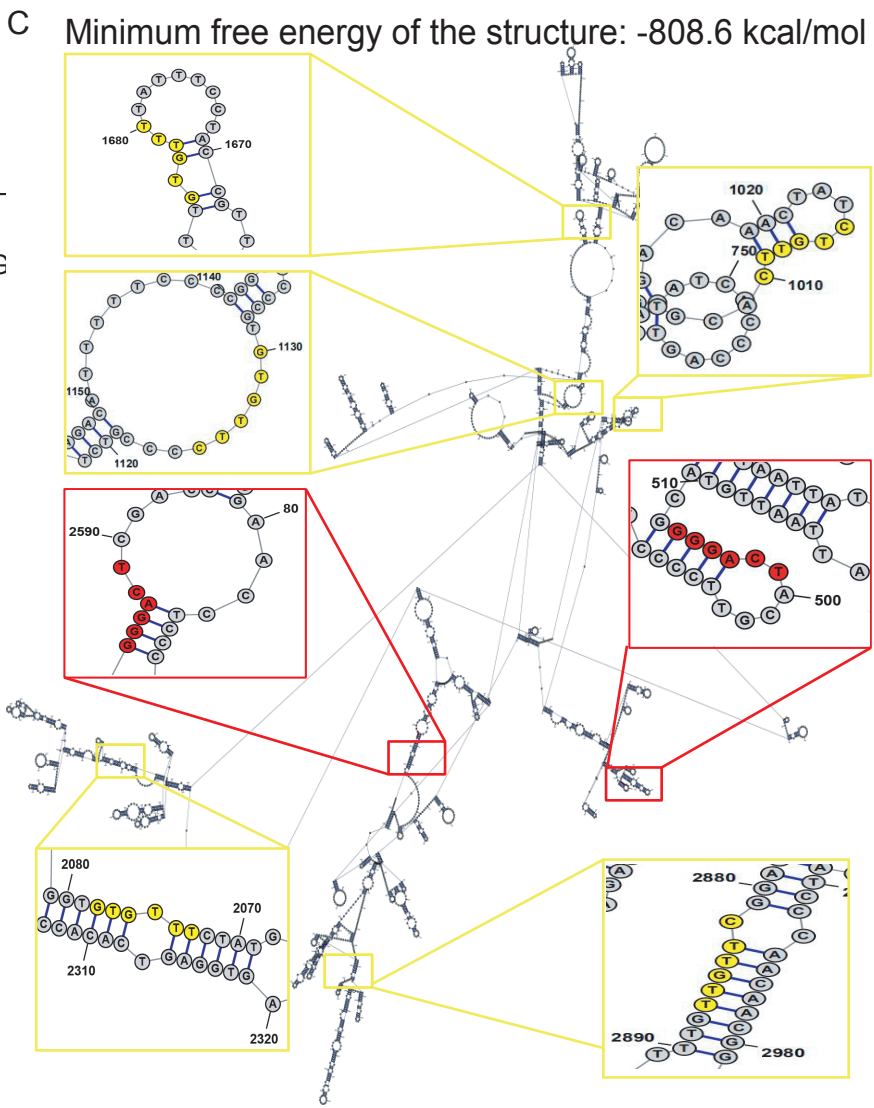

**D**

**Dual Luciferase Reporter Gene Assay**

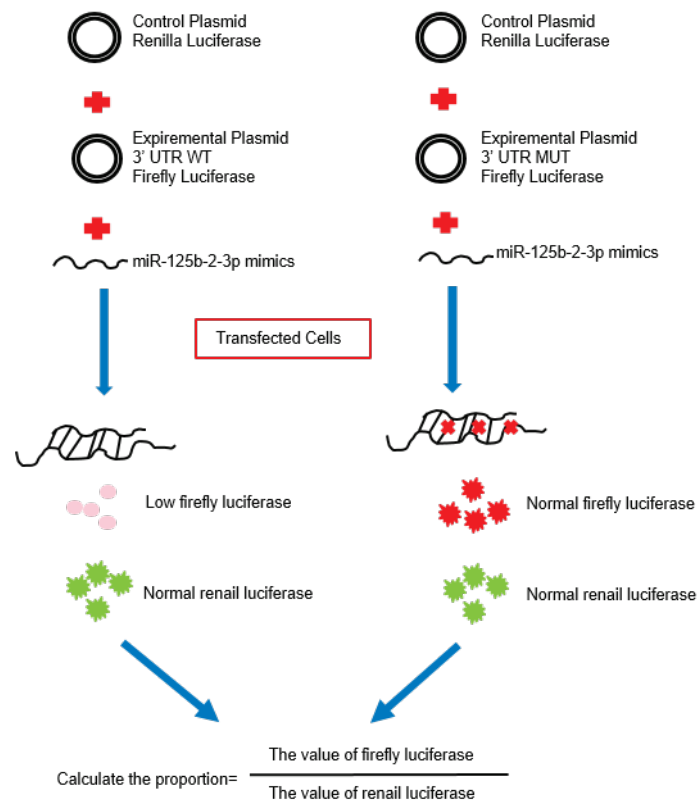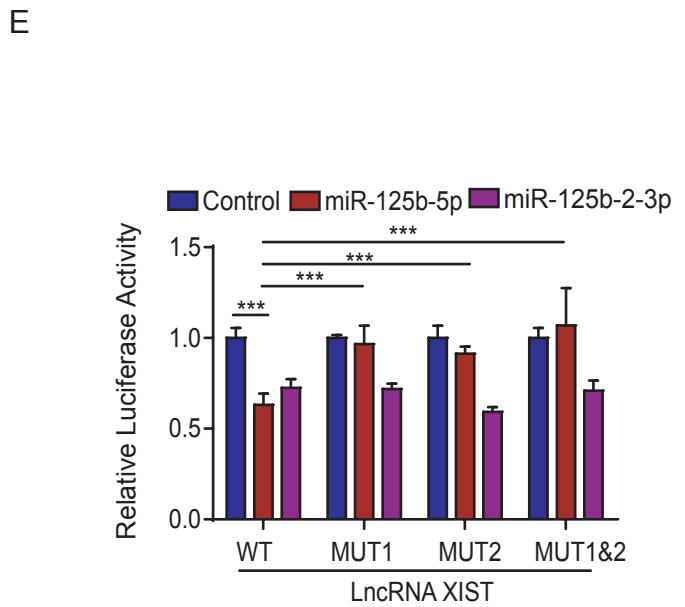

Supplement: CAM4-10-2423-s007.pdf [file CAM4-10-2423-s007.pdf]
